# Supplementary material
Source: publisher figshare collection journal article supplement (https://tandf.figshare.com/ndownloader/files/14378768)
Supplement: Supplementary file 1 [file 14378768]

**Table S3. Primer Sequences**

| **Assay** | **Gene** | **Forward primer** | **Reverse primer** | **Product size (bp)** | **Sequencing primer** |
| --- | --- | --- | --- | --- | --- |
| RT-qPCR | *Pan-POTE* | 5’-AACTCCTGCTGGACAGACGAT-3’ | 5’-GAGCAGTGCTTTGGCCATTA-3’ | 209 | n/a |
| RT-qPCR | *NBL2* | 5’-GGCTGATGGATG AGTGAA-3’ | 5’-GCTGTGTTCTCTGGA CTCC-3’ | 164 | n/a |
| Pyro-sequencing | Global *LINE-1* | 5’-TTGAGTTAGGTGTGGGATATAGTT-3’ | 5’-Biotin-CAAAAAATCAAAAAATTCCCTTTC-3’ | 148 | 5’-ATTAGGGTGGGAGTGA-3’ |
| Pyro-sequencing | *POTE (G/H/M) LINE-1* | 5’-TTTGTTTAATTTAAAAGATTATAGAAT-3’ | 5’-Biotin-TCCAAAACCCTCAAACTAAAATAACTA-3’ | 176 | 5’-TTTTGAGAGAAAAGATGGGGTAG-3’ |
| Pyro-sequencing | *POTE (B/C/D) LINE-1* | 5’-ATTATATAGGATAAATTTTGAGAGAA-3’ | 5’-Biotin-tataccacaaaatctcttctacccctaatA-3’ | 133 | 5’-Attattttttttgtttgggtaatt-3’ |
| Pyro-sequencing | *POTE (G/H/M) Promoter* | 5’-AGTYGTTATAAGTTAGTTAAGTTAT-3’ | 5’-Biotin-ACCACRTATACTAACACCACCAAAAA-3’ | 197 (*POTEG*)  164 (*POTEH)*  185 (*POTEM*) | 5’-TTATAAGTTAGTTAAGTTATT-3’ |
